# Supplementary material for: Attitudes and awareness of regional Pacific Island students towards e-learning
Source: Int J Educ Technol High Educ. 2021 Mar 11;18(1):13. doi: 10.1186/s41239-021-00248-z (PMC7946445; doi:10.1186/s41239-021-00248-z)
Supplement: Supplementary file 1 — Additional file 1. Survey Instrument. [file 41239_2021_248_MOESM1_ESM.pdf]

**Transforming Higher Education in the South Pacific using**
**E-Learning Technologies and Digital Literacy**

*(Note: By filling this questionnaire you agree to participate in this research project. Personal identification details are not asked in this survey therefore you remain anonymous. All responses will be confidential, compiled and analysed as a group.) Please circle or tick where necessary.*

School/ Institute: \_\_\_\_\_ | Form/Year: \_\_\_\_\_ | Gender: ☐ Male ☐ Female  
 Age: \_\_\_\_\_ | School Location: ☐ Urban ☐ Rural | Country: \_\_\_\_\_  
 Programme/Subject Area: \_\_\_\_\_

1. How long have you been using computers/ and internet?

☐ Less than 1 year ☐ 1-3 yrs ☐ 4-6 yrs ☐ >6yrs

2. Do you own an ICT device of your own? If yes, which one?

\_\_\_\_\_

3. Which statement best describes you?

- a. I love new technology and I am usually the first one to try them.
- b. I like new technology and I like to try to before the people I know.
- c. I use new technology when I know people whom I know use them.
- d. I am one of the last people to try new technology.
- e. I am not used to new technology, I use if I have to.

4. How much time do you spend doing the following activities per day using internet?

|           | School Activities | Edutainment (Games, Music, Videos, Social Networks) |
|-----------|-------------------|-----------------------------------------------------|
| < 1 hour  |                   |                                                     |
| 1-4 hours |                   |                                                     |
| 5-8 hours |                   |                                                     |
| >9 hours  |                   |                                                     |

5. What type of Internet connection do you have access to?

- ☐ Broadband home ☐ Broadband school/university  
☐ Wi-fi connection ☐ Mobile Internet

6. Which of the following activities do you perform using internet and how often?

|                                                       | Frequently | Very Often | Sometimes | Rarely | Never |
|-------------------------------------------------------|------------|------------|-----------|--------|-------|
| Email                                                 |            |            |           |        |       |
| Downloading music and video                           |            |            |           |        |       |
| Communication (Skype, Viber, Facebook, Online forums) |            |            |           |        |       |
| Social Networking                                     |            |            |           |        |       |
| Reading wikis                                         |            |            |           |        |       |
| ebooks                                                |            |            |           |        |       |
| Reading free course content                           |            |            |           |        |       |
| Learning Management System                            |            |            |           |        |       |
| Digital Library                                       |            |            |           |        |       |
| Playing games                                         |            |            |           |        |       |
| Accessing Online Educational Resources                |            |            |           |        |       |
| Attending online mentoring                            |            |            |           |        |       |

7. How important are the following?

|                            | Very Important | Important | Neutral | Not very important | Not important at all |
|----------------------------|----------------|-----------|---------|--------------------|----------------------|
| Email groups               |                |           |         |                    |                      |
| Video and audio tutorial   |                |           |         |                    |                      |
| blogs                      |                |           |         |                    |                      |
| Social Networking sites    |                |           |         |                    |                      |
| Wikis and podcast          |                |           |         |                    |                      |
| ebooks                     |                |           |         |                    |                      |
| Open Educational Resources |                |           |         |                    |                      |
| Learning Management System |                |           |         |                    |                      |
| Digital Library            |                |           |         |                    |                      |
| educational games          |                |           |         |                    |                      |
| Attending online mentoring |                |           |         |                    |                      |

8. What are some of the challenges affecting the use of ICTs for learning?

---

---

---

9. What are some positive and negative implications of learning with ICT.

Positive: \_\_\_\_\_

---

---

Negative: \_\_\_\_\_

---

---

10. Do you think learning with ICT is a good idea? State with reasons.

---

---

---

---

11. How will you rate yourself in the following?

| Variables                                                        | Excellent | Good | Fair | Low capability | No Capability |
|------------------------------------------------------------------|-----------|------|------|----------------|---------------|
| <b>Use of Computers (Technical)</b>                              |           |      |      |                |               |
| Turning on a computer                                            |           |      |      |                |               |
| Customising desktop environment                                  |           |      |      |                |               |
| Opening a file                                                   |           |      |      |                |               |
| Copying and Deleting a file                                      |           |      |      |                |               |
| Organizing and managing files                                    |           |      |      |                |               |
| Connecting to Internet                                           |           |      |      |                |               |
| Installing a program                                             |           |      |      |                |               |
| Printing a document                                              |           |      |      |                |               |
| Placing an image on a document                                   |           |      |      |                |               |
| Using Microsoft word/ excel and powerpoint                       |           |      |      |                |               |
| <b>Information Literacy (Finding and Evaluating Information)</b> |           |      |      |                |               |
| Downloading files                                                |           |      |      |                |               |
| Saving image from web                                            |           |      |      |                |               |
| Emailing                                                         |           |      |      |                |               |
| Creating web pages                                               |           |      |      |                |               |
| Sending attachments                                              |           |      |      |                |               |

|                                                            |  |  |  |  |  |
|------------------------------------------------------------|--|--|--|--|--|
| Able to use search engines                                 |  |  |  |  |  |
| Using keywords to find information                         |  |  |  |  |  |
| Using given URL to look for information                    |  |  |  |  |  |
| Using bookmark                                             |  |  |  |  |  |
| Using advance search                                       |  |  |  |  |  |
| Navigating through web pages                               |  |  |  |  |  |
| Navigating through files                                   |  |  |  |  |  |
| Internet Browsing                                          |  |  |  |  |  |
| Presentation tools                                         |  |  |  |  |  |
| Participating in social networks                           |  |  |  |  |  |
| Using the Internet safely                                  |  |  |  |  |  |
| Using information from the Internet without plagiarising   |  |  |  |  |  |
| Judging the reliability of the information on the Internet |  |  |  |  |  |

12. Rate using the scale: 5- Strongly Agree, 4- Agree, 3- Neutral, 2- Disagree, 1- strongly disagree

- i. I feel confident in using computers \_\_\_\_\_
- ii. I feel confident using the computer organize tools \_\_\_\_\_
- iii. I feel confident in organizing and managing files \_\_\_\_\_
- iv. I feel confident troubleshooting computer problems \_\_\_\_\_
- v. I can complete the required task using the learning tools if I have the manuals for reference \_\_\_\_\_
- vi. I can complete the required task using the learning tools if I have the built in facility for assistance \_\_\_\_\_
- vii. I can complete the required task using the learning tools if someone showed showed me how to do it first \_\_\_\_\_
- ii. I enjoy using ICT for my studies \_\_\_\_\_
- iii. I believe that e-learning gives me the opportunity to acquire new knowledge \_\_\_\_\_
- iv. I believe that e-learning enhances my learning experience \_\_\_\_\_
- v. I believe that E-learning increases the quality of learning because it integrates all forms of media \_\_\_\_\_
- vi. I feel satisfied with my learning content by adopting to E-Learning Technology \_\_\_\_\_
- vii. I would be interested in studying courses that use e-learning \_\_\_\_\_

13. Rate using the scale: 5- Strongly Agree, 4- Agree, 3- Neutral, 2- Disagree, 1- strongly disagree

- a. Technology gives me access to wide range of learning materials. \_\_\_\_\_
- b. Technology keeps me connected to the courses I am enrolled in. \_\_\_\_\_
- c. Technology connects me with my peers and facilitator. \_\_\_\_\_
- d. Technology will help me to complete my work faster. \_\_\_\_\_
- e. Technology will help me to produce quality work. \_\_\_\_\_
- f. Technology makes learning creative. \_\_\_\_\_
- g. Technology will enable me to take control of my learning. \_\_\_\_\_

**Thank you very much for taking part in this survey**
